# Supplementary material
Source: PubMed Central journal article supplement (PMC545812)
Supplement: 7600522s1.pdf [file 7600522s1.pdf]

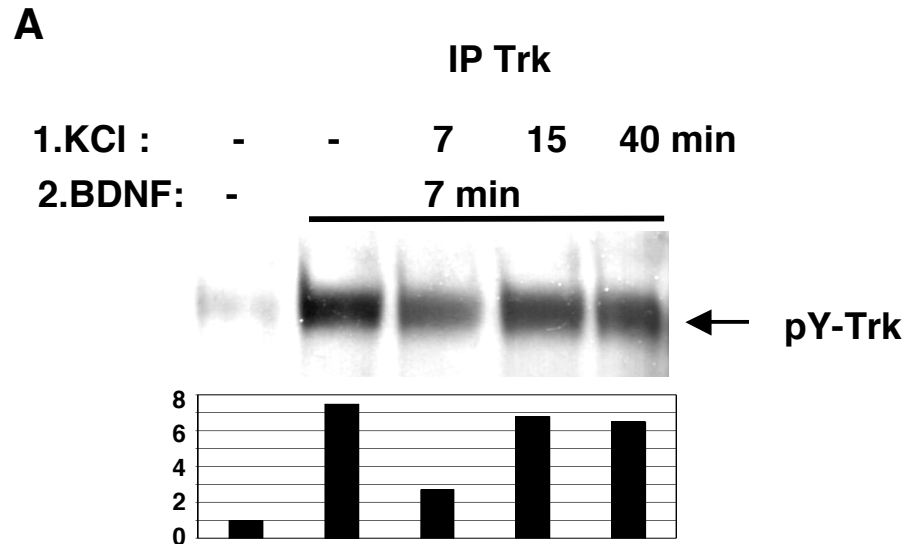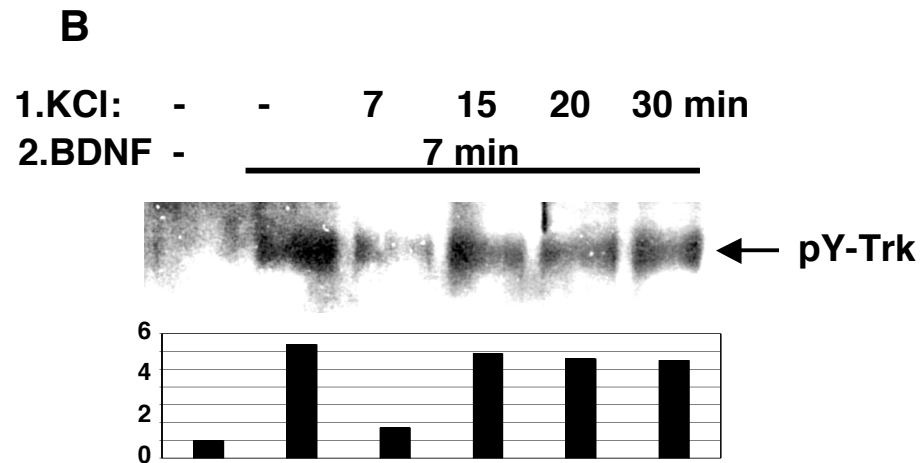

## Supplemental figure 1

Time course of TrkB tyrosine phosphorylation by BDNF in the presence of depolarization. Cultured mouse cerebellar neurons were serum-starved for 3 hours (**A,B**), then treated with 1. KCl (50 mM) for the times shown followed by 2. BDNF (30 ng/ml) for an additional 7 min. Trk immunoprecipitates (**A,B**) were probed with anti-phosphotyrosine antibody. The blots were then scanned and quantified.
