# Supplementary material
Source: PubMed Central journal article supplement (PMC545812)
Supplement: 7600522s2.pdf [file 7600522s2.pdf]

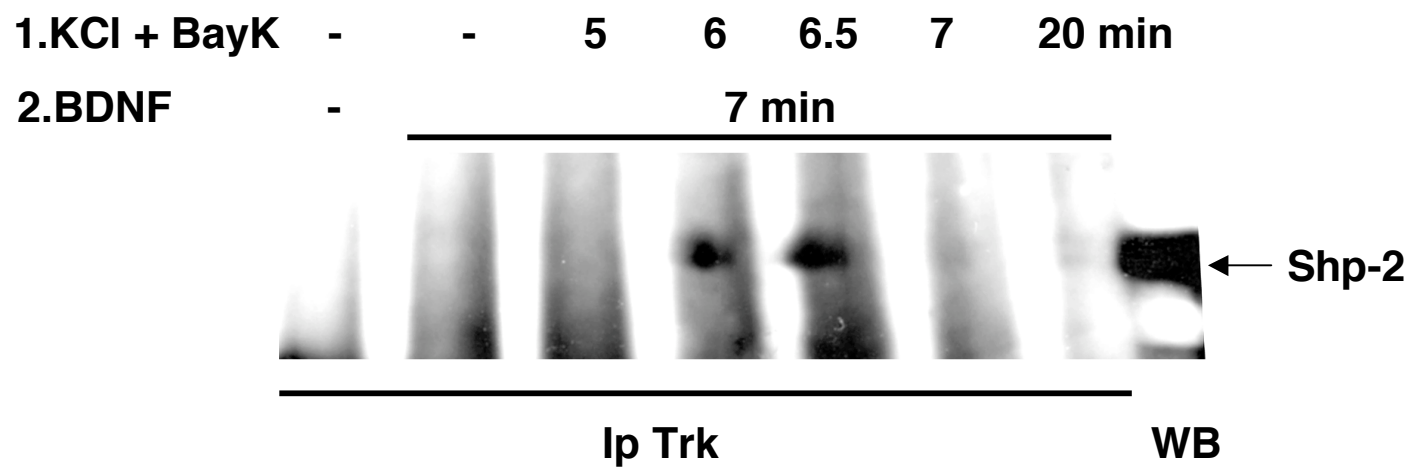

### Supplemental figure 2

Association of TrkB and Shp-2.  
 Trk immunoprecipitates (Ip Trk) from lysates of cerebellar neurons treated with 60 mM KCl plus BayK8644 and 30 ng/ml BDNF as shown, were analyzed for the presence of Shp-2 by immunostaining. Control lane with total cell lysate on right (WB) shows the position of Shp-2 band.
